# Supplementary material for: Insights into the colloidal and structural stability of Atezolizumab with nonpolar amino acid-based ionic liquids under multiple stresses: phase two
Source: Royal Society of Chemistry journal article supplement (doi:10.1039/d5ra08395h), 2026-01-01
Supplement: d5ra08395h1.pdf [file d5ra08395h1.pdf]

## Insights into the colloidal and structural stability of Atezolizumab with nonpolar amino acid-based ionic liquids under multiple stresses: Phase two

Bayan Alkhawaja<sup>1,2\*</sup>, Faisal Al-Akayleh<sup>1</sup>, Saifeddin Daadoue<sup>1</sup>, Nour Alkhawaja<sup>1</sup>, Ghayda' AlDabet<sup>3</sup>, Jehad Nassereden<sup>4</sup>, Muna Bustami<sup>1</sup>, Nidal Qinna<sup>1,3</sup>, Mayyas Al-Remawi<sup>1</sup>, Andrew Watts<sup>2</sup>

### Supplementary Figures

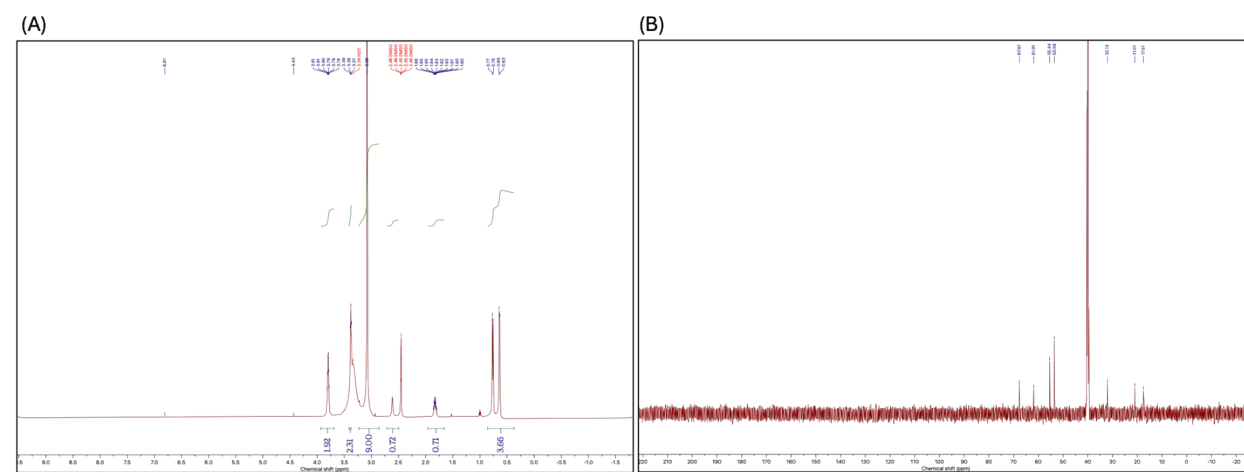

**Figure S1. NMR spectra of CV. A) <sup>1</sup>H NMR spectra, B- <sup>13</sup>C NMR spectrum.**

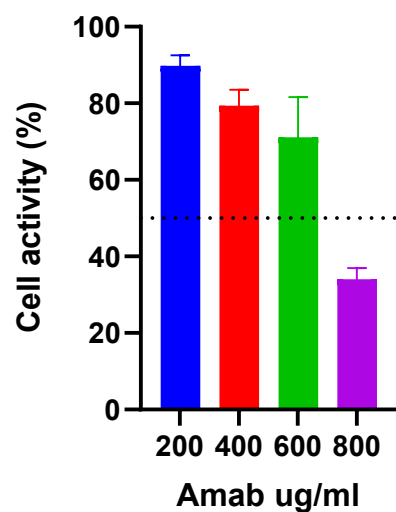

**Figure S2. Cytotoxicity assay (MTT) results using EMT6 cells. EMT6 cells were incubated with Amab formulations (freshly prepared ) for 48 hr. Data represent the mean + SEM (n=4). The dotted line at 50% represents the IC<sub>50</sub>.**

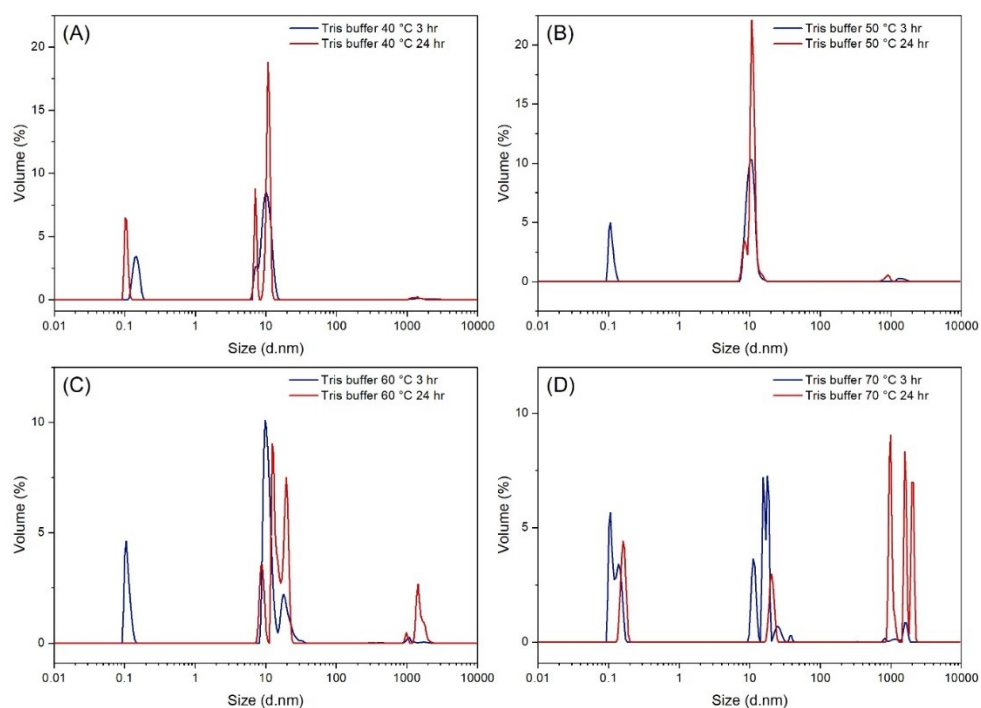

**Figure S3. Amab particle size distribution incubated in Tris buffer after incubation for 24 hr at increasing temperatures ranging from 40°C to 70°C.**

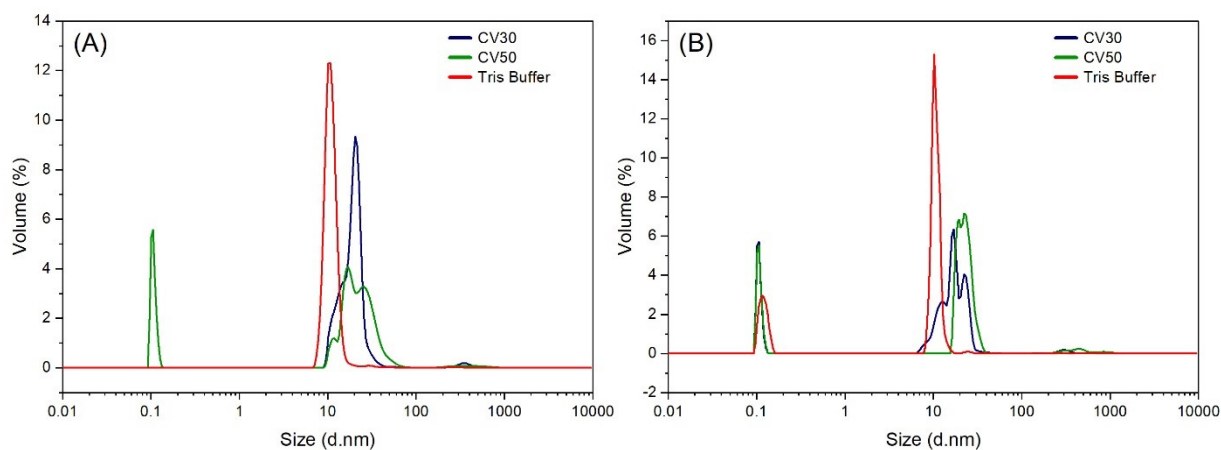

**Figure S4. zeta size with urea (A) 3.5M urea (B) 7M urea**

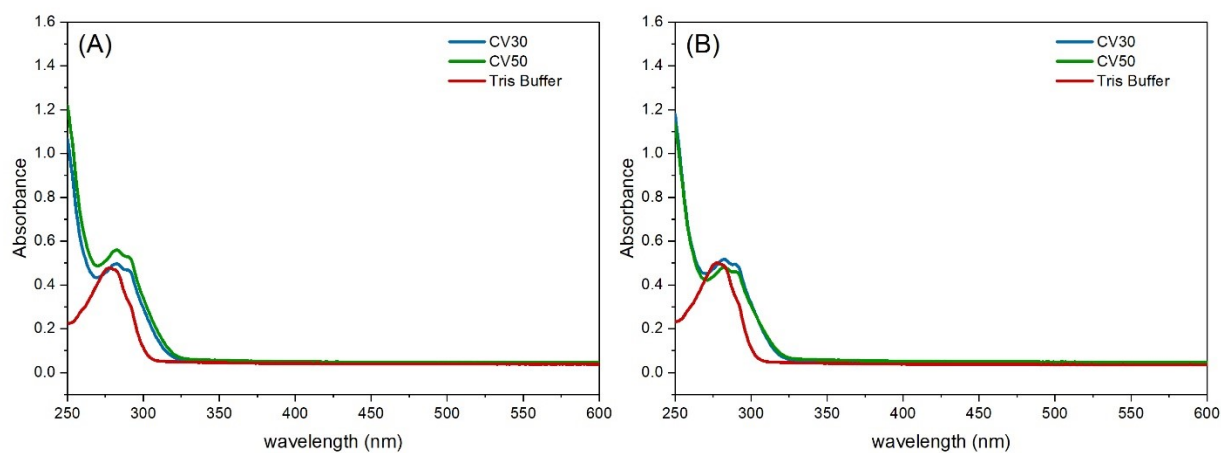

**Figure S5. UV (A) 3.5M urea (B) 7M urea**
